# Supplementary material for: Magnetically-actuated, bead-enhanced silicon photonic immunosensor
Source: Royal Society of Chemistry journal article supplement (doi:10.1039/c5ay01477h), 2015-01-01
Supplement: c5ay01477h1.pdf [file c5ay01477h1.pdf]

## Supplementary data

### Magnetically-actuated, bead-enhanced silicon photonic immunosensor

Enrique Valera, Melinda S. McClellan, and Ryan C. Bailey

*Department of Chemistry, University of Illinois at Urbana–Champaign*

*600 South Matthews Avenue, Urbana, IL 61801, USA*

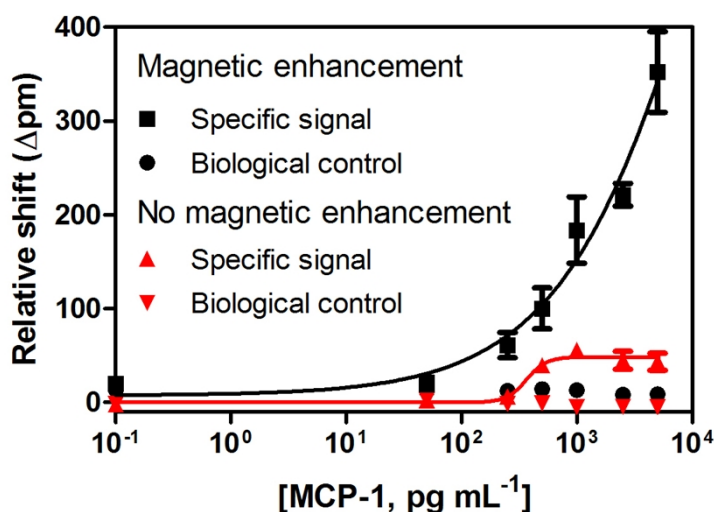

**Fig. S-1.** Calibration curves for the 32 min assays (with and without magnetic actuation) showing both the responses from specific (anti-MCP-1 functionalized) and biological control (isotype control antibody functionalized) microring sensors. With magnetic enhancement, a small increase in the non-specific signal is observed. This is not surprising because the magnetic actuation step brings beads into close contact with the surface, thereby giving more of an opportunity to non-specifically adhere. The fact that the background is not substantially increased, compared to the relatively large increase in specific sensor response, allows for a lower limit of detection to be achieved under conditions of magnetic bead actuation.
